# Supplementary material for: Topical Chlorhexidine 0.2% versus Topical Natamycin 5% for the Treatment of Fungal Keratitis in Nepal: A Randomized Controlled Noninferiority Trial
Source: PubMed Central journal article supplement (PMC9037000; doi:10.1016/j.ophtha.2021.12.004), 2022-05
Supplement: mmc3.pdf [file mmc3.pdf]

**Table S3. Baseline characteristics and loss-to-follow up (LTFU)**

|                             | <b>Lost-to-follow up</b> |         | <b>Followed up</b> |         | <b>Total</b> |         | <b>p-value<sup>^</sup></b> |
|-----------------------------|--------------------------|---------|--------------------|---------|--------------|---------|----------------------------|
| <b>Age, years</b>           | 44.6                     | (14.6)  | 47.0               | (13.1)  | 46.7         | (13.3)  | 0.252                      |
| <b>Sex</b>                  |                          |         |                    |         |              |         |                            |
| <b>Male</b>                 | 19                       | (39.6%) | 116                | (37.9%) | 135          | (38.1%) | 0.873                      |
| <b>Female</b>               | 29                       | (60.4%) | 190                | (62.1%) | 219          | (61.9%) |                            |
| <b>Infiltrate size, mm</b>  | 3.1                      | (1.6)   | 2.9                | (1.8)   | 3.0          | (1.7)   | 0.664                      |
| <b>BSCVA, logMAR</b>        | 0.53                     | (0.56)  | 0.62               | (0.61)  | 0.61         | (0.60)  | 0.316                      |
| <b>Treatment allocation</b> |                          |         |                    |         |              |         |                            |
| <b>Chlorhexidine</b>        | 25                       | (52.1%) | 153                | (50.0%) | 178          | (50.3%) | 0.877                      |
| <b>Natamycin</b>            | 23                       | (47.9%) | 153                | (50.0%) | 176          | (49.7%) |                            |

Data are n (%) or mean (SD).

<sup>^</sup> P value calculated by Fisher's exact test for categorical variables and t-test for non-categorical variables.
